# Supplementary material
Source: publisher site journal article supplement (https://www.dovepress.com/article/385136)
Supplement: Supplementary file 1 [file get_supplementary_file.php]

**Decoding the key functional combined components group and uncovering the molecular mechanism of longdan xiegan decoction in treating uveitis**

**Supplemental Data:**

1. **Table S1**

**Table S1. Active components of LXD filtered by ADME.**

| **ID** | **Component** | **OB*** | **DL*** | **Source** |
| --- | --- | --- | --- | --- |
| MOL000073 | [5, 2'-Dihydroxy-6, 7, 8-trimethoxyflavone](https://tcmspw.com/molecule.php?qn=552" \o "https://tcmspw.com/molecule.php?qn=552) | 31.71 | 0.35 | Huangqin |
| MOL000098 | [Sudan III](https://tcmspw.com/molecule.php?qn=4561" \o "https://tcmspw.com/molecule.php?qn=4561) | 84.07 | 0.59 | Zhizi |
| MOL000131 | [Ent-Epicatechin](https://tcmspw.com/molecule.php?qn=73" \o "https://tcmspw.com/molecule.php?qn=73) | 48.96 | 0.24 | Huangqin |
| MOL000173 | [Wogonin](https://tcmspw.com/molecule.php?qn=173" \o "https://tcmspw.com/molecule.php?qn=173) | 30.68 | 0.23 | Huangqin |
| MOL000211 | [EIC](https://tcmspw.com/molecule.php?qn=131" \o "https://tcmspw.com/molecule.php?qn=131) | 41.9 | 0.14 | Chaihu |
| MOL000228 | [(2R)-7-Hydroxy-5-methoxy-2-phenylchroman-4-one](https://tcmspw.com/molecule.php?qn=228" \o "https://tcmspw.com/molecule.php?qn=228) | 55.23 | 0.20 | Huangqin |
| MOL000239 | [Linoleyl acetate](https://tcmspw.com/molecule.php?qn=1645" \o "https://tcmspw.com/molecule.php?qn=1645) | 42.1 | 0.20 | Chaihu |
| MOL000296 | Sulfoorientalol C | 41.57 | 0.16 | Zexie |
| MOL000354 | (4aS, 6aR, 6aS, 6bR, 8aR, 10R, 12aR, 14bS)-10-Hydroxy-2, 2, 6a, 6b, 9, 9, 12a-heptamethyl-1, 3, 4, 5, 6, 6a, 7, 8, 8a, 10, 11, 12, 13, 14b-Tetradecahydropicene-4a-carboxylic acid | 32.02 | 0.76 | Cheqianzi |
| MOL000358 | β[-Sitosterol](https://tcmspw.com/molecule.php?qn=358" \o "https://tcmspw.com/molecule.php?qn=358) | 36.91 | 0.75 | Huangqin |
| MOL000359 | Sitosterol | 36.91 | 0.75 | Longdan |
| MOL000392 | [Isoliquiritigenin](https://tcmspw.com/molecule.php?qn=1789" \o "https://tcmspw.com/molecule.php?qn=1789) | 85.32 | 0.15 | Chaihu |
| MOL000417 | [Baicalin](https://tcmspw.com/molecule.php?qn=2776" \o "https://tcmspw.com/molecule.php?qn=2776) | 40.12 | 0.75 | Chaihu |
| MOL000422 | Kaempferol | 41.88 | 0.24 | Longdan |
| MOL000449 | [EIC](https://tcmspw.com/molecule.php?qn=131" \o "https://tcmspw.com/molecule.php?qn=131) | 41.9 | 0.14 | Huangqin |
| MOL000490 | Stigmasterol | 43.83 | 0.76 | Dihuang |
| MOL000497 | [Stigmasterol](https://tcmspw.com/molecule.php?qn=449" \o "https://tcmspw.com/molecule.php?qn=449) | 43.83 | 0.76 | Chaihu |
| MOL000500 | [Isorhamnetin](https://tcmspw.com/molecule.php?qn=354" \o "https://tcmspw.com/molecule.php?qn=354) | 49.60 | 0.31 | Chaihu |
| MOL000525 | [Sitosterol](https://tcmspw.com/molecule.php?qn=359" \o "https://tcmspw.com/molecule.php?qn=359) | 36.91 | 0.75 | Huangqin |
| MOL000552 | [Norwogonin](https://tcmspw.com/molecule.php?qn=525" \o "https://tcmspw.com/molecule.php?qn=525) | 39.40 | 0.21 | Huangqin |
| MOL000675 | [Quercetin](https://tcmspw.com/molecule.php?qn=98" \o "https://tcmspw.com/molecule.php?qn=98) | 46.43 | 0.28 | Zhizi |
| MOL000749 | Jioglutin D | 39.02 | 0.14 | Dihuang |
| MOL000763 | 16β-Methoxyalisol B monoacetate | 32.43 | 0.77 | Zexie |
| MOL000830 | [Isoimperatorin](https://tcmspw.com/molecule.php?qn=1942" \o "https://tcmspw.com/molecule.php?qn=1942) | 45.46 | 0.23 | Zhizi |
| MOL000831 | [Exceparl M-OL](https://tcmspw.com/molecule.php?qn=2203" \o "https://tcmspw.com/molecule.php?qn=2203) | 31.90 | 0.16 | Zhizi |
| MOL000832 | [Ethyl oleate (NF)](https://tcmspw.com/molecule.php?qn=2883" \o "https://tcmspw.com/molecule.php?qn=2883) | 32.40 | 0.19 | Zhizi |
| MOL000839 | [5-Hydroxy-7-methoxy-2-(3, 4, 5-trimethoxyphenyl)chromone](https://tcmspw.com/molecule.php?qn=3095" \o "https://tcmspw.com/molecule.php?qn=3095) | 51.96 | 0.41 | Zhizi |
| MOL000846 | [3-Methylkempferol](https://tcmspw.com/molecule.php?qn=7245" \o "https://tcmspw.com/molecule.php?qn=7245) | 60.16 | 0.26 | Zhizi |
| MOL000849 | [GBGB](https://tcmspw.com/molecule.php?qn=9038" \o "https://tcmspw.com/molecule.php?qn=9038) | 45.58 | 0.83 | Zhizi |
| MOL000853 | Sitosterol | 36.91 | 0.75 | Zexie |
| MOL000854 | Alisol B | 34.47 | 0.82 | Zexie |
| MOL000856 | Alisol B monoacetate | 35.59 | 0.81 | Zexie |
| MOL000862 | Alisol, b, 23-acetate | 32.52 | 0.82 | Zexie |
| MOL001406 | [Rivularin](https://tcmspw.com/molecule.php?qn=12266" \o "https://tcmspw.com/molecule.php?qn=12266) | 37.94 | 0.37 | Huangqin |
| MOL001458 | [Stigmasterol](https://tcmspw.com/molecule.php?qn=449" \o "https://tcmspw.com/molecule.php?qn=449) | 43.83 | 0.76 | Huangqin |
| MOL001484 | [Kaempferol](https://tcmspw.com/molecule.php?qn=422" \o "https://tcmspw.com/molecule.php?qn=422) | 41.88 | 0.24 | Chaihu |
| MOL001490 | [Coptisine](https://tcmspw.com/molecule.php?qn=1458" \o "https://tcmspw.com/molecule.php?qn=1458) | 30.67 | 0.86 | Huangqin |
| MOL001494 | [EIC](https://tcmspw.com/molecule.php?qn=131" \o "https://tcmspw.com/molecule.php?qn=131) | 41.90 | 0.14 | Zhizi |
| MOL001506 | [Bis[(2S)-2-ethylhexyl] benzene-1, 2-dicarboxylate](https://tcmspw.com/molecule.php?qn=1490" \o "https://tcmspw.com/molecule.php?qn=1490) | 43.59 | 0.35 | Huangqin |
| MOL001558 | Sesamin | 56.55 | 0.83 | Longdan |
| MOL001641 | [β-Sitosterol](https://tcmspw.com/molecule.php?qn=358" \o "https://tcmspw.com/molecule.php?qn=358) | 36.91 | 0.75 | Zhizi |
| MOL001645 | Aristolochic acid Ⅱ | 37.56 | 0.45 | Mutong |
| MOL001663 | [Crocetin](https://tcmspw.com/molecule.php?qn=1406" \o "https://tcmspw.com/molecule.php?qn=1406) | 35.30 | 0.26 | Zhizi |
| MOL001689 | [Acacetin](https://tcmspw.com/molecule.php?qn=1689" \o "https://tcmspw.com/molecule.php?qn=1689) | 34.97 | 0.24 | Huangqin |
| MOL001735 | 1-Monolinolein | 37.18 | 0.30 | Zexie |
| MOL001745 | [Kaempferol](https://tcmspw.com/molecule.php?qn=422" \o "https://tcmspw.com/molecule.php?qn=422) | 41.88 | 0.24 | Zhizi |
| MOL001771 | Alisol B | 36.76 | 0.82 | Zexie |
| MOL001789 | Quercetin | 46.43 | 0.28 | Cheqianzi |
| MOL001792 | [3, 5, 6, 7-Tetramethoxy-2-(3, 4, 5-trimethoxyphenyl)chromone](https://tcmspw.com/molecule.php?qn=4598" \o "https://tcmspw.com/molecule.php?qn=4598) | 31.97 | 0.59 | Chaihu |
| MOL001889 | [Supraene](https://tcmspw.com/molecule.php?qn=1506" \o "https://tcmspw.com/molecule.php?qn=1506) | 33.55 | 0.42 | Huangqin |
| MOL001941 | [(4aS, 6aR, 6aS, 6bR, 8aR, 10R, 12aR, 14bS)-10-Hydroxy-2, 2, 6a, 6b, 9, 9, 12a-heptamethyl-1, 3, 4, 5, 6, 6a, 7, 8, 8a, 10, 11, 12, 13, 14b-tetradecahydropicene-4a-carboxylic acid](https://tcmspw.com/molecule.php?qn=1663" \o "https://tcmspw.com/molecule.php?qn=1663) | 32.03 | 0.76 | Zhizi |
| MOL001942 | [Stigmasterol](https://tcmspw.com/molecule.php?qn=449" \o "https://tcmspw.com/molecule.php?qn=449) | 43.83 | 0.76 | Zhizi |
| MOL002203 | [Oleic acid](https://tcmspw.com/molecule.php?qn=675" \o "https://tcmspw.com/molecule.php?qn=675) | 33.13 | 0.14 | Zhizi |
| MOL002311 | [Areapillin](https://tcmspw.com/molecule.php?qn=4609" \o "https://tcmspw.com/molecule.php?qn=4609) | 48.96 | 0.41 | Chaihu |
| MOL002322 | Isovitexin | 31.29 | 0.72 | Longdan |
| MOL002464 | Rel-(1R, 3aS, 4S, 7S, 8R, 8aS)-7-isopropyl-1, 4-dimethyldecahydro-4, 7-epoxyazulene-1, 8-diol | 94.43 | 0.15 | Zexie |
| MOL002565 | [Cubebin](https://tcmspw.com/molecule.php?qn=13187" \o "https://tcmspw.com/molecule.php?qn=13187) | 57.13 | 0.64 | Chaihu |
| MOL002714 | [Baicalein](https://tcmspw.com/molecule.php?qn=2714" \o "https://tcmspw.com/molecule.php?qn=2714) | 33.52 | 0.21 | Huangqin |
| MOL002776 | Sitosterol | 36.91 | 0.75 | Cheqianzi |
| MOL002844 | [Longikaurin A](https://tcmspw.com/molecule.php?qn=4624" \o "https://tcmspw.com/molecule.php?qn=4624) | 47.72 | 0.53 | Chaihu |
| MOL002879 | [Methyl linolelaidate](https://tcmspw.com/molecule.php?qn=1889" \o "https://tcmspw.com/molecule.php?qn=1889) | 41.93 | 0.17 | Huangqin |
| MOL002883 | [Mandenol](https://tcmspw.com/molecule.php?qn=1494" \o "https://tcmspw.com/molecule.php?qn=1494) | 42.00 | 0.19 | Zhizi |
| MOL002897 | [Diop](https://tcmspw.com/molecule.php?qn=2879" \o "https://tcmspw.com/molecule.php?qn=2879) | 43.59 | 0.39 | Huangqin |
| MOL002908 | [5, 8, 2'-Trihydroxy-7-methoxyflavone](https://tcmspw.com/molecule.php?qn=2908" \o "https://tcmspw.com/molecule.php?qn=2908) | 37.01 | 0.27 | Huangqin |
| MOL002909 | [5, 7, 2, 5-Tetrahydroxy-8, 6-dimethoxyflavone](https://tcmspw.com/molecule.php?qn=2909" \o "https://tcmspw.com/molecule.php?qn=2909) | 33.82 | 0.45 | Huangqin |
| MOL002910 | [Carthamidin](https://tcmspw.com/molecule.php?qn=2910" \o "https://tcmspw.com/molecule.php?qn=2910) | 41.15 | 0.24 | Huangqin |
| MOL002911 | [2, 6, 2', 4'-Tetrahydroxy-6'-methoxychaleone](https://tcmspw.com/molecule.php?qn=2911" \o "https://tcmspw.com/molecule.php?qn=2911) | 69.04 | 0.22 | Huangqin |
| MOL002913 | [Dihydrobaicalin_qt](https://tcmspw.com/molecule.php?qn=2913" \o "https://tcmspw.com/molecule.php?qn=2913) | 40.04 | 0.21 | Huangqin |
| MOL002914 | [Eriodyctiol (flavanone)](https://tcmspw.com/molecule.php?qn=2914" \o "https://tcmspw.com/molecule.php?qn=2914) | 41.35 | 0.24 | Huangqin |
| MOL002915 | [Salvigenin](https://tcmspw.com/molecule.php?qn=2915" \o "https://tcmspw.com/molecule.php?qn=2915) | 49.07 | 0.33 | Huangqin |
| MOL002917 | [5, 2', 6'-Trihydroxy-7, 8-dimethoxyflavone](https://tcmspw.com/molecule.php?qn=2917" \o "https://tcmspw.com/molecule.php?qn=2917) | 45.05 | 0.33 | Huangqin |
| MOL002925 | [5, 7, 2', 6'-Tetrahydroxyflavone](https://tcmspw.com/molecule.php?qn=2925" \o "https://tcmspw.com/molecule.php?qn=2925) | 37.01 | 0.24 | Huangqin |
| MOL002926 | [Dihydrooroxylin A](https://tcmspw.com/molecule.php?qn=2926" \o "https://tcmspw.com/molecule.php?qn=2926) | 38.72 | 0.23 | Huangqin |
| MOL002927 | [Skullcapflavone II](https://tcmspw.com/molecule.php?qn=2927" \o "https://tcmspw.com/molecule.php?qn=2927) | 69.51 | 0.44 | Huangqin |
| MOL002928 | [Oroxylin A](https://tcmspw.com/molecule.php?qn=2928" \o "https://tcmspw.com/molecule.php?qn=2928) | 41.37 | 0.23 | Huangqin |
| MOL002932 | [Panicolin](https://tcmspw.com/molecule.php?qn=2932" \o "https://tcmspw.com/molecule.php?qn=2932) | 76.26 | 0.29 | Huangqin |
| MOL002933 | [5, 7, 4'-Trihydroxy-8-methoxyflavone](https://tcmspw.com/molecule.php?qn=2933" \o "https://tcmspw.com/molecule.php?qn=2933) | 36.56 | 0.27 | Huangqin |
| MOL002934 | [Neobaicalein](https://tcmspw.com/molecule.php?qn=2934" \o "https://tcmspw.com/molecule.php?qn=2934) | 104.34 | 0.44 | Huangqin |
| MOL002937 | [Dihydrooroxylin](https://tcmspw.com/molecule.php?qn=2937" \o "https://tcmspw.com/molecule.php?qn=2937) | 66.06 | 0.23 | Huangqin |
| MOL003095 | [Supraene](https://tcmspw.com/molecule.php?qn=1506" \o "https://tcmspw.com/molecule.php?qn=1506) | 33.55 | 0.42 | Zhizi |
| MOL003137 | Leucanthoside | 32.12 | 0.78 | Longdan |
| MOL003143 | Gentirigenic acid | 38.78 | 0.78 | Longdan |
| MOL003152 | Gentisin | 64.06 | 0.21 | Longdan |
| MOL003155 | Pranferin | 52.14 | 0.28 | Longdan |
| MOL003169 | Gentiopicroside tetraacetate | 32.44 | 0.7 | Longdan |
| MOL003170 | Gentisein | 67.57 | 0.19 | Longdan |
| MOL003656 | [Octalupine](https://tcmspw.com/molecule.php?qn=4628" \o "https://tcmspw.com/molecule.php?qn=4628) | 47.82 | 0.28 | Chaihu |
| MOL003708 | Aristolochic acid A | 62.71 | 0.55 | Mutong |
| MOL003896 | [Sainfuran](https://tcmspw.com/molecule.php?qn=4644" \o "https://tcmspw.com/molecule.php?qn=4644) | 79.91 | 0.23 | Chaihu |
| MOL004328 | [Troxerutin](https://tcmspw.com/molecule.php?qn=4648" \o "https://tcmspw.com/molecule.php?qn=4648) | 31.60 | 0.28 | Chaihu |
| MOL004561 | [Ammidin](https://tcmspw.com/molecule.php?qn=1941" \o "https://tcmspw.com/molecule.php?qn=1941) | 34.55 | 0.22 | Zhizi |
| MOL004598 | Dinatin | 30.97 | 0.27 | Cheqianzi |
| MOL004609 | Daucostero_qt | 36.91 | 0.75 | Cheqianzi |
| MOL004624 | Hypolaetin | 33.24 | 0.28 | Cheqianzi |
| MOL004628 | Orobanchoside_qt | 55.99 | 0.82 | Cheqianzi |
| MOL004644 | Plantaginin_qt | 54.04 | 0.24 | Cheqianzi |
| MOL004648 | β-Sitosterol | 36.91 | 0.75 | Danggui |
| MOL004653 | Stigmasterol | 43.83 | 0.76 | Danggui |
| MOL004683 | 2, 6-Di(phenyl)thiopyran-4-thione | 69.13 | 0.15 | Danggui |
| MOL004702 | EIC | 41.90 | 0.14 | Dihuang |
| MOL004718 | Sitosterol | 36.91 | 0.75 | Dihuang |
| MOL004805 | [(+)-Anomalin](https://tcmspw.com/molecule.php?qn=4653" \o "https://tcmspw.com/molecule.php?qn=4653) | 46.06 | 0.66 | Chaihu |
| MOL004806 | [Methyl (2E, 4E)-octadeca-2, 4-dienoate](https://tcmspw.com/molecule.php?qn=4683" \o "https://tcmspw.com/molecule.php?qn=4683) | 38.77 | 0.17 | Chaihu |
| MOL004808 | [Saikosaponin c_qt](https://tcmspw.com/molecule.php?qn=4702" \o "https://tcmspw.com/molecule.php?qn=4702) | 30.50 | 0.63 | Chaihu |
| MOL004810 | [α-Spinasterol](https://tcmspw.com/molecule.php?qn=4718" \o "https://tcmspw.com/molecule.php?qn=4718) | 42.98 | 0.76 | Chaihu |
| MOL004811 | [Petunidin](https://tcmspw.com/molecule.php?qn=490" \o "https://tcmspw.com/molecule.php?qn=490) | 30.05 | 0.31 | Chaihu |
| MOL004814 | [Oleic acid](https://tcmspw.com/molecule.php?qn=675" \o "https://tcmspw.com/molecule.php?qn=675) | 33.13 | 0.14 | Chaihu |
| MOL004815 | [Quercetin](https://tcmspw.com/molecule.php?qn=98" \o "https://tcmspw.com/molecule.php?qn=98) | 46.43 | 0.28 | Chaihu |
| MOL004820 | [Linoleic](https://tcmspw.com/molecule.php?qn=749" \o "https://tcmspw.com/molecule.php?qn=749) | 41.90 | 0.14 | Chaihu |
| MOL004824 | Quercetin | 46.43 | 0.28 | Gancao |
| MOL004827 | Mairin | 55.38 | 0.78 | Gancao |
| MOL004828 | Jaranol | 50.83 | 0.29 | Gancao |
| MOL004829 | Isorhamnetin | 49.60 | 0.30 | Gancao |
| MOL004833 | Sitosterol | 36.91 | 0.75 | Gancao |
| MOL004835 | Formononetin | 69.67 | 0.21 | Gancao |
| MOL004836 | Calycosin | 47.75 | 0.24 | Gancao |
| MOL004838 | Kaempferol | 41.88 | 0.24 | Gancao |
| MOL004841 | Licochalcone A | 40.79 | 0.29 | Gancao |
| MOL004848 | Vestitol | 74.66 | 0.21 | Gancao |
| MOL004849 | Inermine | 75.18 | 0.54 | Gancao |
| MOL004855 | Isoliquiritigenin | 85.32 | 0.15 | Gancao |
| MOL004856 | DFV | 32.76 | 0.18 | Gancao |
| MOL004857 | Glycyrol | 90.78 | 0.67 | Gancao |
| MOL004860 | Medicarpin | 49.22 | 0.34 | Gancao |
| MOL004863 | Pinocembrin | 64.72 | 0.18 | Gancao |
| MOL004864 | Lupiwighteone | 51.64 | 0.37 | Gancao |
| MOL004866 | 7-Methoxy-2-methyl isoflavone | 42.56 | 0.20 | Gancao |
| MOL004879 | Naringenin | 59.29 | 0.21 | Gancao |
| MOL004882 | (2S)-2-[4-Hydroxy-3-(3-methylbut-2-enyl)phenyl]-8, 8-dimethyl-2, 3-dihydropyrano[2, 3-f]chromen-4-one | 31.79 | 0.72 | Gancao |
| MOL004883 | Euchrenone | 30.29 | 0.57 | Gancao |
| MOL004884 | Glyasperin B | 65.22 | 0.44 | Gancao |
| MOL004885 | Glyasperin F | 75.84 | 0.54 | Gancao |
| MOL004891 | Glyasperin C | 45.56 | 0.40 | Gancao |
| MOL004898 | Isotrifoliol | 31.94 | 0.42 | Gancao |
| MOL004903 | (E)-1-(2, 4-Dihydroxyphenyl)-3-(2, 2-dimethylchromen-6-yl)prop-2-en-1-one | 39.62 | 0.35 | Gancao |
| MOL004904 | Kanzonols W | 50.48 | 0.52 | Gancao |
| MOL004905 | (2S)-6-(2, 4-Dihydroxyphenyl)  -2-(2-hydroxypropan-2-yl)-4-methoxy-2, 3-dihydrofuro[3, 2-g]chromen-7-one | 60.25 | 0.63 | Gancao |
| MOL004907 | Semilicoisoflavone B | 48.78 | 0.55 | Gancao |
| MOL004908 | Glepidotin A | 44.72 | 0.35 | Gancao |
| MOL004910 | Glepidotin B | 64.46 | 0.34 | Gancao |
| MOL004911 | Phaseolinisoflavan | 32.01 | 0.45 | Gancao |
| MOL004912 | Glypallichalcone | 61.60 | 0.19 | Gancao |
| MOL004913 | Echinatin | 66.58 | 0.17 | Gancao |
| MOL004914 | 8-(6-Hydroxy-2-benzofuranyl)-2, 2-dimethyl-5-chromenol | 58.44 | 0.38 | Gancao |
| MOL004915 | Licochalcone B | 76.76 | 0.19 | Gancao |
| MOL004917 | Licochalcone G | 49.25 | 0.32 | Gancao |
| MOL004924 | 3-(2, 4-Dihydroxyphenyl)-8-(1, 1-dimethylprop-2-enyl)-7-hydroxy-5-methoxy-coumarin | 59.62 | 0.43 | Gancao |
| MOL004935 | Licoricone | 63.58 | 0.47 | Gancao |
| MOL004941 | Gancaonin A | 51.08 | 0.40 | Gancao |
| MOL004945 | Gancaonin B | 48.79 | 0.45 | Gancao |
| MOL004948 | Licorice glycoside E | 32.89 | 0.27 | Gancao |
| MOL004949 | 1. (3, 4-Dihydroxyphenyl)-5, 7-dihydroxy-8-(3-methylbut-2-enyl) 2. chromone | 66.37 | 0.41 | Gancao |
| MOL004957 | 5, 7-Dihydroxy-3-(4-methoxyphenyl)-8-  (3-methylbut-2-enyl)chromone | 30.49 | 0.41 | Gancao |
| MOL004959 | 2-(3, 4-Dihydroxyphenyl)-5, 7-dihydroxy-6-(3-methylbut-2-enyl) chromone | 44.15 | 0.41 | Gancao |
| MOL004961 | Glycyrin | 52.61 | 0.47 | Gancao |
| MOL004966 | Licocoumarone | 33.21 | 0.36 | Gancao |
| MOL004974 | Licoisoflavone | 41.61 | 0.42 | Gancao |
| MOL004978 | Licoisoflavone B | 38.93 | 0.55 | Gancao |
| MOL004980 | Licoisoflavanone | 52.47 | 0.54 | Gancao |
| MOL004985 | Shinpterocarpin | 80.30 | 0.73 | Gancao |
| MOL004988 | (E)-3-[3, 4-Dihydroxy-5-(3-methylbut-2-enyl)phenyl]-1-(2, 4-dihydroxyphenyl)prop-2-en-1-one | 46.27 | 0.31 | Gancao |
| MOL004989 | Liquiritin | 65.69 | 0.74 | Gancao |
| MOL004990 | Licopyranocoumarin | 80.36 | 0.65 | Gancao |
| MOL004991 | 3, 22-Dihydroxy-11-oxo-delta(12)-oleanene-27-alpha-methoxycarbonyl-29-oic acid | 34.32 | 0.55 | Gancao |
| MOL004993 | Glyzaglabrin | 61.07 | 0.35 | Gancao |
| MOL004996 | Glabridin | 53.25 | 0.47 | Gancao |
| MOL005000 | Glabranin | 52.90 | 0.31 | Gancao |
| MOL005001 | Glabrene | 46.27 | 0.44 | Gancao |
| MOL005003 | Glabrone | 52.51 | 0.50 | Gancao |
| MOL005007 | 1, 3-Dihydroxy-9-methoxy-6-benzofurano[3, 2-c]chromenone | 48.14 | 0.43 | Gancao |
| MOL005008 | 1, 3-Dihydroxy-8, 9-dimethoxy-6-benzofurano[3, 2-c]chromenone | 62.90 | 0.53 | Gancao |
| MOL005012 | Eurycarpin A | 43.28 | 0.37 | Gancao |
| MOL005013 | Glycyroside | 37.25 | 0.79 | Gancao |
| MOL005016 | (-)-Medicocarpin | 40.99 | 0.95 | Gancao |
| MOL005017 | Sigmoidin-B | 34.88 | 0.41 | Gancao |
| MOL005018 | (2R)-7-Hydroxy-2-(4-hydroxyphenyl)chroman-4-one | 71.12 | 0.18 | Gancao |
| MOL005020 | (2S)-7-hydroxy-2-(4-hydroxyphenyl)-8-(3-methylbut-2-enyl)chroman-4-one | 36.57 | 0.32 | Gancao |
| MOL005869 | Hederagenin | 36.91 | 0.75 | Mutong |
| MOL007245 | [Methyl linoleate](https://tcmspw.com/molecule.php?qn=1641" \o "https://tcmspw.com/molecule.php?qn=1641) | 41.93 | 0.17 | Zhizi |
| MOL007813 | β-Sitosterol | 36.91 | 0.75 | Mutong |
| MOL007819 | Stigmasterol | 43.83 | 0.76 | Mutong |
| MOL007835 | Aristoloside_qt | 40.32 | 0.60 | Mutong |
| MOL007836 | Poriferast-5-en-3beta-ol | 36.91 | 0.75 | Mutong |
| MOL008206 | [Epiberberine](https://tcmspw.com/molecule.php?qn=2897" \o "https://tcmspw.com/molecule.php?qn=2897) | 43.09 | 0.78 | Huangqin |
| MOL008259 | Ariskanin A | 109.51 | 0.40 | Mutong |
| MOL009038 | [Methyl vaccenate](https://tcmspw.com/molecule.php?qn=1745" \o "https://tcmspw.com/molecule.php?qn=1745) | 31.90 | 0.17 | Zhizi |
| MOL010415 | [Moslosooflavone](https://tcmspw.com/molecule.php?qn=8206" \o "https://tcmspw.com/molecule.php?qn=8206) | 44.09 | 0.25 | Huangqin |
| MOL010799 | Alisol C | 32.70 | 0.82 | Zexie |
| MOL010803 | Alisol C monoacetate | 33.06 | 0.83 | Zexie |
| MOL010804 | [(1S, 3R)-1-[(2R)-3, 3-Dimethyloxiran-2-yl]-3-[(5R, 8S, 9S, 10S, 11S, 14R)-11-hydroxy-4, 4, 8, 10, 14-pentamethyl-3-oxo-1, 2, 5, 6, 7, 9, 11, 12, 15, 16-decahydrocyclopenta[a]phenanthren-17-yl]butyl] acetate | 35.58 | 0.81 | Zexie |
| MOL011081 | [11, 13-Eicosadienoic acid, methyl ester](https://tcmspw.com/molecule.php?qn=10415" \o "https://tcmspw.com/molecule.php?qn=10415) | 39.28 | 0.23 | Huangqin |
| MOL012245 | [Linolenic acid methyl ester](https://tcmspw.com/molecule.php?qn=11081" \o "https://tcmspw.com/molecule.php?qn=11081) | 46.15 | 0.17 | Huangqin |
| MOL012246 | [5, 7, 4'-Trihydroxy-6-methoxyflavanone](https://tcmspw.com/molecule.php?qn=12245" \o "https://tcmspw.com/molecule.php?qn=12245) | 36.63 | 0.27 | Huangqin |
| MOL012266 | [5, 7, 4'-Trihydroxy-8-methoxyflavanone](https://tcmspw.com/molecule.php?qn=12246" \o "https://tcmspw.com/molecule.php?qn=12246) | 74.24 | 0.26 | Huangqin |
| MOL013187 | Dihydrotricetin | 58.12 | 0.28 | Cheqianzi |

***OB: oral bioavailability, DL: Drug-like**

1. **Table S2**

**Table S2. The detailed information of network FACs in LXD.**

| **FACs** | **Gene list** | ***P-*value** | **FDR value** |
| --- | --- | --- | --- |
| 1 | APP, HSP90AA1, ESR1, MYC, ELAVL1, CDK2, TP53, CREBBP, FN1, RB1, HDAC1, CDK1, EP300, RELA, SMARCA4, HSPA4, PCNA, HDAC2, XPO1, SMAD3, JUN, SMARCA2, MDM2, MAPK8, AKT1, NFKB1, HDAC3, VCAM1, CDKN1A, ATF2, MAPK14, STAT3, CCNB1, AR, PRKDC, MTOR, CEBPB, CCNE1, CSNK2A1, PLK1, CDK4, GSK3B, KAT2B, NR3C1, E2F1, CASP3, ETS1, CDC25A, CCND1, ENO1, KAT5, CDKN1B, CHEK1, HSPA5, CDK3, TOP1, MAP2K1, FOS, STUB1, E2F4, MNAT1, RBL1, HSPA1A, HSPD1, TFDP1, TBP, MAPK10, CCNH, HMGB1, VIM, MAPK11, MAPK9, E2F3, TOP2A, BCL2, CDC25B, SMARCB1, CCNA2, RXRA, EEF1A1, CCNE2, RBBP4, CDK9, CDK6, RBL2, SOD1, CDK8, NCOA1, HDAC9, CDKN2A, PPARG, PKN1, CEBPA, POLA1, ENO2, VDR, HSPG2, CSNK2A2, CDK5, SOD2, RARA, MYOD1, CHEK2, CCND3, MCM7, SNCA, NCOA2, CFTR, BCL6, RUNX2, TOP2B, CDC25C, TFDP2, E2F2, E2F5, FEN1, PSMD2, CCND2, GSK3A, SKP2, DNMT1, STAT6, RBBP7, APEX1, NR0B2, REL, NOS2, HMGB2, ERCC5, SUMO4, TAF1, TRAP1, CDK13, CDK15, ARID4A, RXRB, AURKA, ACTA2, PPIA, CDK14, SREBF2, FAF1, MDM4, LDHA, MAK, EPAS1, SSB, CCNG1, RXRG, HNF4A, PPARD, EIF4A1, SUV39H1, CDK17, KDM4C, AIRE, CCNT1, CDK5R1, POLI, SREBF1, PSTPIP1, BRCA2, UCHL1, CAMKK1, PHLPP2, ICK, RRM1, SPI1, UBTF, SIRT5, NEK2, APPL1, THRA, VRK2, RBBP6, CDK18, PGR, POLR3A, THRB, EIF4A3, UBA2, TKT, DKC1, AICDA, IMPDH2, EIF4A2, RELB, BCL2L11, RBBP5, STK35, PDK1, MCL1, FUS, MYCN, LPIN2, RARB, GSR, MAPKAPK2, DEK, SENP1, SAE1, KIF11, FABP4, PYGM, DDX1, ARID4B, SPP1, GAPDHS, LIN54, S100A8, CEP290, TNNT2, PIM1, CREM, ICAM1, S100A9, MAPKAPK3, KLF5, PYGL, HSD17B10, OGT, KDM5B, ELF1, PPM1A, MAPK15, METAP2, UBLCP1, FOXP3, TBX21, TRIM39, NR1I2, KDM2A, MTFMT, AKT3, TNFSF11, GLUL, PTP4A3, SOX9, KIF4A, USP5, MAPKAPK5, NLRP3, ESRRG, RARG, PBK, IL16, PRDM2, NEK7, EID1, PTPN3, PSMB9, ARFGAP1, ATF1, DCLK3, SENP6, KDM4B, PNMA2, PTPRD, IFI16, ALDH5A1, DAPK3, RBBP8, IKZF1, QPCTL, SRP72, MBTPS1, CDKN2C, CCNK, KDM2B, GFPT1, KIF14, CDKN2B, SLC2A1, PHF8, GALK1, BLOC1S1, NR1I3, FABP1, DHFR, UBR4, PPIG, SRSF6, GLI1, TRIB2, SP100, TNFRSF18, UHRF1, PADI4, SH2D1A, RBP4, PTPN7, DYRK4, PDE5A, RBBP9, KRT7, CRYAA, MBTPS2, KYNU, ALPP, LAP3, KDM4D, CBX7, DNPEP, RBP3, NLRP12, TYMS, USP50, GTF2IRD1, MX1, MTCP1, TRIP11, AHI1, PRODH, DYRK3, PARP14, DUSP5, NELFCD, ARFGAP3, AMY1C, CRX, TCN2, AGBL2, SLC17A5, ARFGAP2, NLRP7, FOXP1, RLBP1, CFHR2, NAT2, GIMAP4, GNLY, HCP5, CD58, NARF, DHPS, TOR1A, CD69, SLC12A1, DNASE1L3, AMY1B, NT5C, FST, SULT2A1, EPO, EPCAM, SERPINF1, RPE65, UACA, IL36RN, GPER1, P2RX4, CC2D2A | 0.0001 | 0.000717 |
| 2 | MAPT, CALM1, ABCG2, ESR2, CYP1B1, TDP1, ODC1, CREB1, CBR1, ABCB1, ALOX5, CYP19A1, HIF1A, ALOX12, PTPRS, CA7, P4HB, ABCC1, VEGFA, AKR1B1, ALOX15, IL2, AKR1B10, XDH, DYRK1A, TYR, KCND3, MAOA, NQO1, PTGS1, ACP1, TERT, PTGS2, CYP1A1, MAOB, GLO1, CA4, MPG, CA13, PGF, HSD17B3, ERAP1, TTR, ALOX15B, NOX4, CA3, ABCC2, ALDH2, DAPK1, MIF, ERN1, GRK6, AMY1B, AMY1C, AMY1A, AKR1B15, ESRRA, CA12, TUBB3, CTSV, TNKS, ALDH1B1, CYP1A2TCF4, CYP2C8, ST6GAL1, NFE2L2, PDK3, TUBB1, ALOXE3, MBNL1, AHR, KLK2, HSD17B1, ESRRB, ALDH1A2, ALPI, DLAT, CA2, PDK4, NR4A2, MPO, ALOX12B, TNKS2, RDH8, MBNL2, NUAK1, CA9, PLAA, CELA1, CA1, MBNL3, MDH1, PIP5K1C, HSD11B2, CA5A, ACVR2B, ACVR2A, ALDH1A1, BACE1, ST3GAL3, CAMK4, CA14, CA6, GPR35, KDM4E, P29474, PON1, CA5B, IL6, P29475, P35228, SENP7, HSD17B2, SLC16A3, AKR1A1, SLCO2B1, CDC42BPB, COMT, CSNK1A1L, FUT7, CBR3, CHRNA7, KLK7, CDKL5, FUT4, STK32A, CRYZ, NQO2, ALDH1A3, ALDH1L1, TNNI3, GUSB, PLA2G1B, SLC37A4, SLC9A1, AKR1E2, ALPL, GFER, MMP26, QDPR, ABAT, AOX1, BACE2, TNNC1, DBH, TPMT, STK17B, LRP6, CISD1, DSTYK, PCSK7, MUC5AC, AQP1, ALDH1L2, TSSK2, ABCB4, AKR1C1, AKR1C2, AKR1C3, KCNN2, CYP11B2, CYP11B1, KCNB1, Q9HCR9, ANGPT2, MMP15, KCNN1, PLA2G2E, KCNK9, TMIGD3, KCNN4, HDAC11, MTTP, BRD9, GZMK, CDK5R1, CDK5, SLC22A12, SAE1, UBA2, TCN1, CETP, CSNK2A3, EWS-Fli1, GPR183, KLK14, MRP3, SLC16A7, TRPM2, AZU1, CCNE2, CDK2, CCNE1 | 0.0001 | 0.000614 |
| 3 | GNG2, GNB1, PIK3CG, NMUR2, LPAR5, POMC, TAS2R31, LPAR2, C3, LPAR3, LPAR1, CCR5, CXCR6, ADRA2C, CXCR3, CCR1, MCHR1, GNAI3, CCR7, OXER1, CCR6, GNAI1, ADORA2A, CXCL2, ADORA1, S1PR1, ADCY1, CCL5, S1PR3, CXCL13, ADCY6, ADCY5, CXCL10, S1PR4, CXCL9, CXCL5, GABBR1, TAS2R9, CCL25, S1PR5, TAS2R7, S1PR2, CCR4, CXCR2, CXCR1, GABBR2, MTNR1A, CNR1, TAS2R19, TAS2R20, TAS2R43, OPRD1, ADORA2B, TAS2R46, TAS2R14, OPRM1, TAS2R10, TAS2R13, TAS2R50, MTNR1B, CNR2, CXCL12, PTGER3, ADORA3, DRD2, NPBWR1, DRD4, P2RY14, OPRL1, CCR2, CXCR5, OPRK1, DRD3, ADRA2A, CHRM4, CHRM2, ADRA2B, CCR9, ADM, GPBAR1, AVPR2, GNAO1, LHCGR, DRD1, ADCYAP1R1, PTGER2, PTGER4, DRD5, PTGIR, PTGDR, SCTR, DPP4, PTH, ADA, PDE1B, CCL3, CCL4, CCL11, PIR, MRAP, GLRA1, GLRA2, GLRA3, GLRA4 | 0.0001 | 0.000614 |
| 4 | SRC, PIK3R1, HRAS, FYN, EGFR, ABL1, KRAS, PTPN1, PTPN11, NRAS, PLCG1, PDPK1, JAK2, PTPN6, YES1, ERBB2, STAT1, PTPN2, JAK1, ERBB3, RAF1, PTK2, ERBB4, CD4, CD247, CAMK2A, PTPRC, FLT1, MET, BRAF, KDR, FGFR1, FGFR2, SOCS1, CAMK2B, ZAP70, PDGFRB, RPS6KA3, INSR, FGFR3, FGF2, RPS6KA2, AKT2, KIT, CISH, ACVR1, HLA-DRB1, LAT, FGR, HLA-DQB1, HLA-DQA1, ARF1, CD28, CNTN2, IGF1R, FLT4, HLA-DPB1, FBN1, HCK, FGFR4, FGF19, IFNGR2, IL2RA, IL2RB, FRK, CTLA4, IL3, CD79B, CSF1, FGF1, PD, GFRA, IFNG, TXK, CD19, ALK, FCGR2A, CD80, CD86, PTPRJ, LRBA, IL5, AZIN1, CTSL1, CSF1R, IFNA17, RASGRP1, CTSK, INS, CD22, TRPV4, IL6R, PDCD1, PTPN22, IFNB1, MATK, IFNA2, ADC, AXL, , KCNMA1, LAT2, DUSP3, FLT3, KIR2DS1, IDO1, DYNLT1, CTSL2, KIR3DS1, LTK, PTPRF, IL15, FCRL3, CCL18, IL13, ITGAL, SIT1, CD68, P2RX7, SEPSECS, AFF2, VEGFB, PCCA, IL1RAPL2 | 0.0001 | 0.00086 |
| 5 | MT-CYB, NDUFA4, ATP5A1, MT-ND4L, NDUFA11, ATP5B, NDUFC2, NDUFB10, NDUFA9, MT-ND4, MDH2, NDUFB7, NDUFB6, NDUFB11, NDUFA8, NDUFA5, NDUFA10, NDUFB1, NDUFB4, NDUFB3, NDUFB9, MT-ND5, NDUFA1, NDUFB2, NDUFS1, NDUFB5, NDUFS5, MT-ND3, MT-ND2, MT-ND6, MT-ND1, NDUFB8, NDUFA2, ATP5C1, NDUFA3, NDUFA6, NDUFC1, NDUFA7, NDUFA13, NDUFS3, NDUFS2, NDUFS4, NDUFA12, NDUFAB1, NDUFV1, NDUFV2, NDUFS6, NDUFS7, NDUFS8, NDUFV3, NDUFAF3, CPT1A, NDUFAF1, MT-CO1, NDUFAF4, TGM1, NDUFAF2 | 0.0001 | 0.00215 |
| 6 | POLH, PLA2G4A, PPARA, TLR2, SPHK1, KDM5A, CES2, PLA2G2A, DNM1, POLB, TRPV1, FAAH, EPHX2, MGLL, PAFAH1B2, DAGLA, IARS, PLA2G4C, SPHK2, PDCD4, POLK, PAM, SMPD2, PLA2G4B, SLC25A20, ENPP2, CES1, POLL, KDM4A, COL4A3BP, HAO1, SELP, FABP3, PLA2G5, ADH1B, EPHX1, SPTLC1, GPR174, GPR34, PLA2G10, NAAA, HSD11B1, PLA2G2C, GSTK1, CYP4F2, POLM, SOAT2, ACER2, HSD11B1L, ADH7, SPTLC2, SLC22A8, GSTA1, SLC22A6, LCN2, SLCO2A1, ENPEP, FFAR4, TBXAS1, ASAH1, ADH1A, ADH1C, GSTM1, PTGES, UGCG, BHMT, PMP2, BBOX1, GABRQ, KDM7A, MPEG1, SLC6A11, MGST1, FABP12, FABP9, P05413, P15090, Q01469, CPT1B, CYP2C9, P07148, FABP2, GLTP, PTPMT1, FABP7, PLA2G2D, Q969P6 | 0.0001 | 0.001433 |
| 7 | F2, P2RY11, LPAR4, HTR2C, LPAR6, HTR2A, P2RY10, F2RL3, HTR2B, LTB4R, TACR1, PTAFR, EDNRA, FFAR1, EDNRB, PTGFR, TBXA2R, CHRM3, MLNR, GHSR, LTB4R2, NTSR1, PTGER1, CYSLTR1, ADRA1B, TAC1, CHRM5, CHRM1, ADRA1A, ADRA1D | 0.0001 | 0.001075 |
| 8 | CD44, MMP2, MMP3, THBS1, COL1A1, MMP9, TGFB1, PLG, MMP1, COL2A1, VTN, LRP2, COL1A2, ACAN, BGN, MMP13, VCAN, SDC1, GFAP, CCL2, IGFBP3, SPARC, S100B, HAPLN1, SERPINE1, TGFB2, HGF, MMP10, MMP12, SELL, PRSS1, COL9A3, SERPING1, S100A1, IGFBP5, COL11A1, TIMP1, COL11A2, COL5A2, COL27A1, COL5A3, COMP, COL9A1, COL9A2, SELE, TIMP2, MMP8, SLC35B2, S100A12, MMP20, MMP27, TGFBR3, TNFRSF11B, JAG1, AKR1C4, COCH, MADCAM1, MATN1, SPINK5, SCGB1A1, SLC9A3, MATN3 | 0.002703 | 0.012916 |

1. **Table S3**

**Table S3. Key components group in LXD.**

| **ID** | **Component** | | **OB*** | **DL*** | | | **Structure** |
| --- | --- | --- | --- | --- | --- | --- | --- |
| MOL000098 | | Quercetin | 46.43 | | | 0.28 | 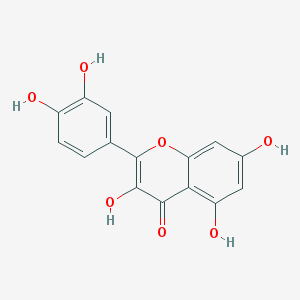 | |
| MOL000525 | | Sitosterol | 36.91 | | | 0.75 | 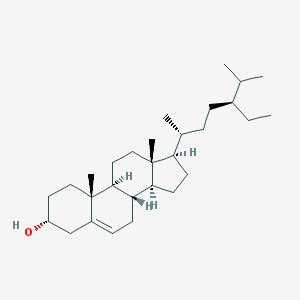 | |
| MOL001689 | | Acacetin | 34.97 | | | 0.24 | 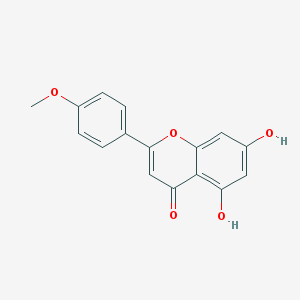 | |
| MOL007819 | | Stigmasterol | 43.83 | | | 0.76 | 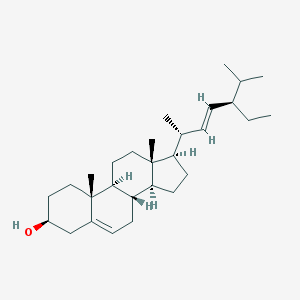 | |
| MOL008206 | | Epiberberine | 30.74 | | | 0.55 | 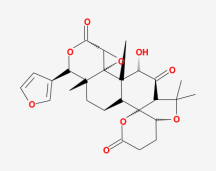 | |
| MOL000173 | | Wogonin | 30.68 | | | 0.23 | 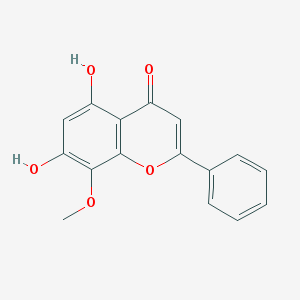 | |
| MOL002932 | | Panicolin | 76.26 | | | 0.29 | 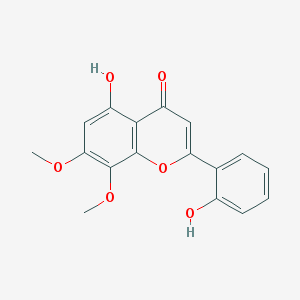 | |
| MOL004961 | | Glycyrin | 52.61 | | | 0.47 | 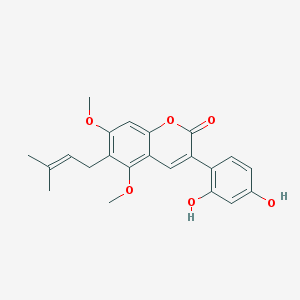 | |
| MOL003896 | | Sainfuran | 79.91 | | | 0.23 | 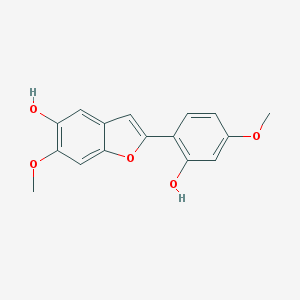 | |
| MOL000131 | | ent-Epicatechin | 48.96 | | | 0.24 | 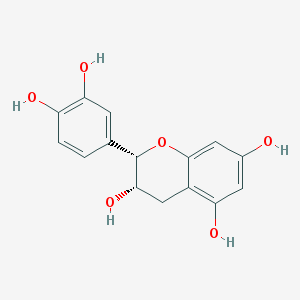 | |
| MOL001494 | | EIC | 41.90 | | | 0.14 | 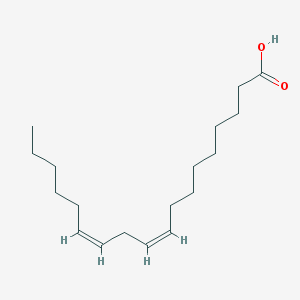 | |
| MOL001745 | | Kaempferol | 41.88 | | | 0.24 | 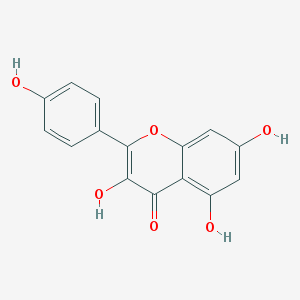 | |
| MOL003170 | | Gentisein | 67.57 | | | 0.19 | 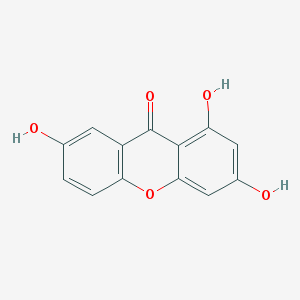 | |
| MOL013187 | | Dihydrotricetin | 58.12 | | | 0.28 | 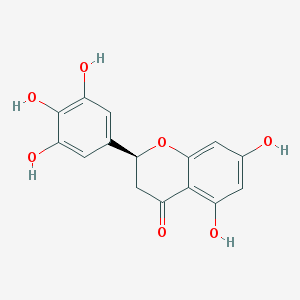 | |
| MOL000675 | | Quercetin | 49.60 | | | 0.31 | 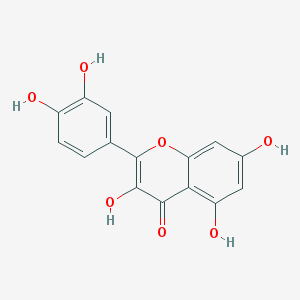 | |
| MOL004985 | | Shinpterocarpin | 80.30 | | | 0.73 | 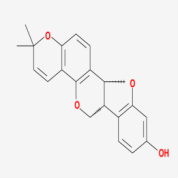 | |
| MOL000239 | | Linoleyl acetate | 42.10 | | | 0.20 | 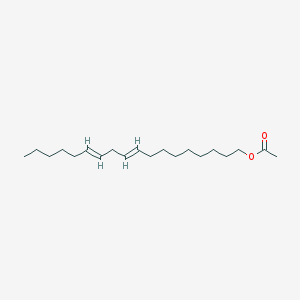 | |
| MOL001789 | | Quercetin | 46.43 | | | 0.28 | 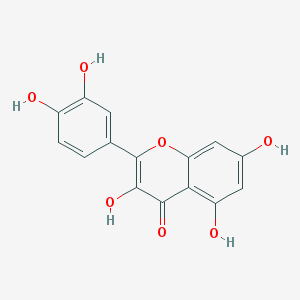 | |
| MOL002714 | | Baicalein | 33.52 | | | 0.21 | 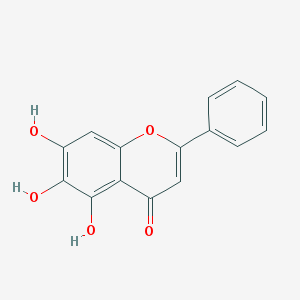 | |
| MOL004835 | | Formononetin | 69.67 | | | 0.21 | 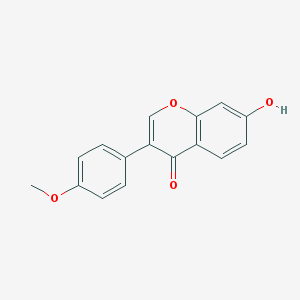 | |
| MOL002883 | | Mandenol | 42.00 | | | 0.19 | 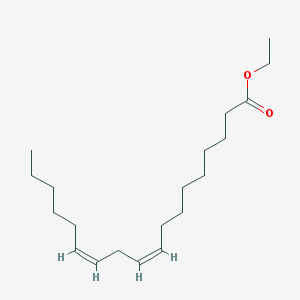 | |
| MOL000392 | | Isoliquiritigenin | 85.32 | | | 0.15 | 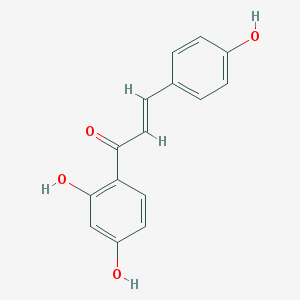 | |
| MOL002911 | | 2, 6, 2', 4'-Tetrahydroxy-6'-methoxychaleone | 69.04 | | | 0.22 | 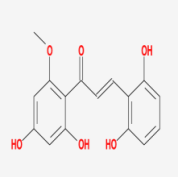 | |
| MOL010415 | | Moslosooflavone | 44.09 | | | 0.25 | 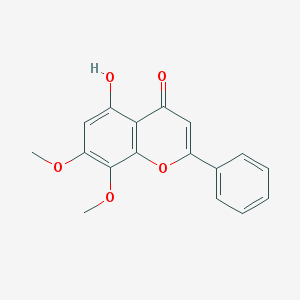 | |
| MOL002322 | | Isovitexin | 31.29 | | | 0.72 | 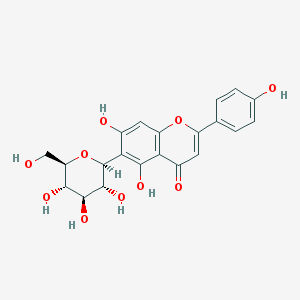 | |
| MOL004866 | | 7-Methoxy-2-methyl isoflavone | 42.56 | | | 0.20 | 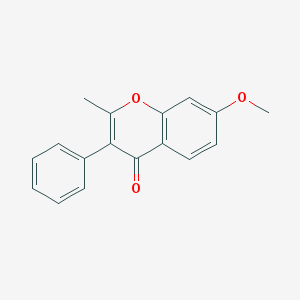 | |
| MOL002928 | | Oroxylin A | 41.37 | | | 0.23 | 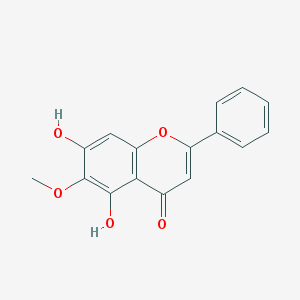 | |
| MOL002464 | | Rel-(1R, 3aS, 4S, 7S, 8R, 8aS)-7-isopropyl-1, 4-dimethyldecahydro-4, 7-epoxyazulene-1, 8-diol | 94.43 | | | 0.15 | 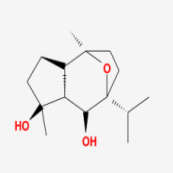 | |
| MOL002925 | | 5, 7, 2', 6'-Tetrahydroxyflavone | 37.01 | | | 0.24 | 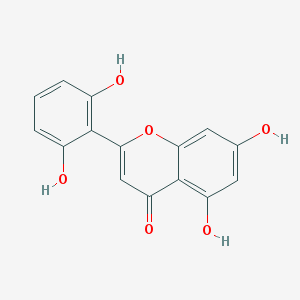 | |
| MOL004991 | | 3, 22-Dihydroxy-11-oxo-delta(12)-oleanene-27-alpha-methoxycarbonyl-29-oic acid | 34.32 | | | 0.55 | 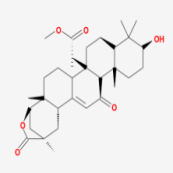 | |
| MOL004841 | | Licochalcone A | 40.79 | | | 0.29 | 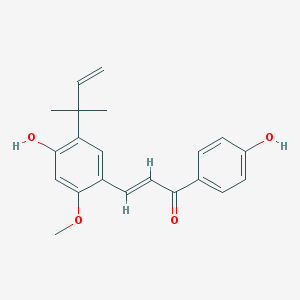 | |
| MOL004883 | | Euchrenone | 30.29 | | | 0.57 | 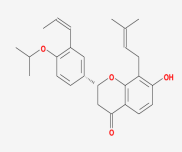 | |
| MOL004914 | | 8-(6-hydroxy-2-benzofuranyl)-2, 2-Dimethyl-5-chromenol | 58.44 | | | 0.38 | 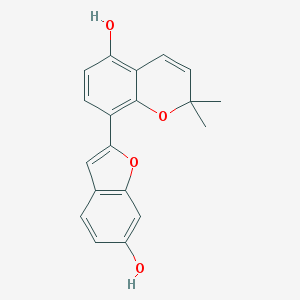 | |
| MOL001645 | | Aristolochic acid Ⅱ | 37.56 | | | 0.45 | 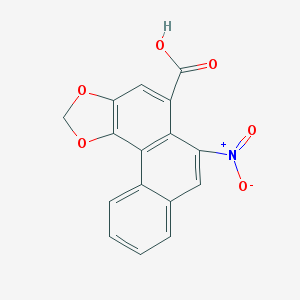 | |
| MOL004683 | | 2, 6-Di(phenyl)thiopyran-4-thione | 69.13 | | | 0.15 | 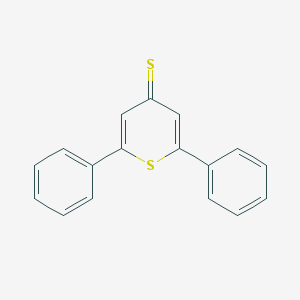 | |
| MOL005008 | | 1, 3-Dihydroxy-8, 9-dimethoxy-6-benzofurano[3, 2-c]chromenone | 62.90 | | | 0.53 | 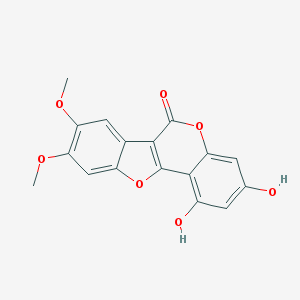 | |
| MOL005017 | | Sigmoidin-B | 34.88 | | | 0.41 | 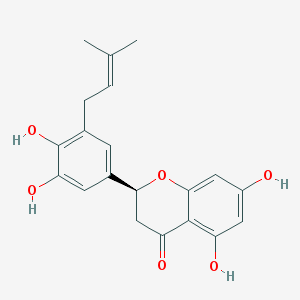 | |
| MOL004855 | | Isoliquiritigenin | 85.32 | | | 0.15 | 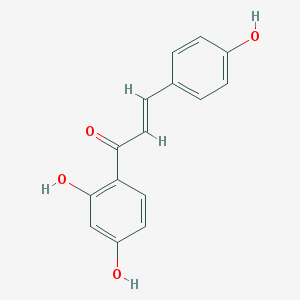 | |
| MOL003137 | | Leucanthoside | 32.12 | | | 0.78 | 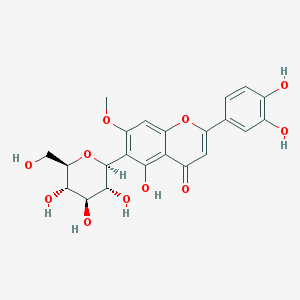 | |
| MOL003656 | | [Octalupine](https://tcmspw.com/molecule.php?qn=4628" \o "https://tcmspw.com/molecule.php?qn=4628) | 47.82 | | | 0.28 | 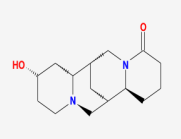 | |
| MOL001942 | | Stigmasterol | 43.83 | | | 0.76 | 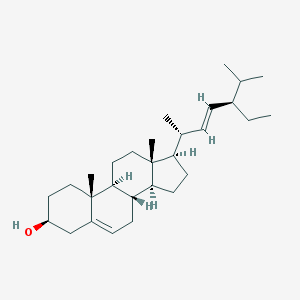 | |
| MOL004980 | | Licoisoflavanone | 52.47 | | | 0.54 | 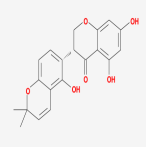 | |
| MOL004598 | | Dinatin | 30.97 | | | 0.27 | 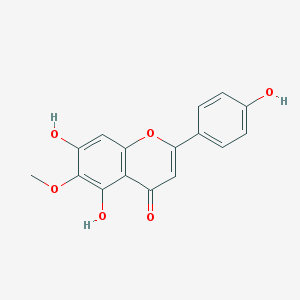 | |
| MOL002937 | | Dihydrooroxylin | 66.06 | | | 0.23 | 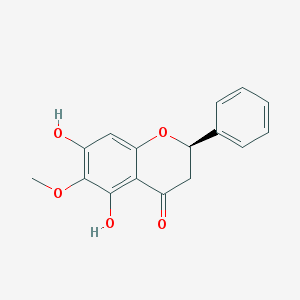 | |
| MOL004948 | | Licorice glycoside E | 32.89 | | | 0.27 | 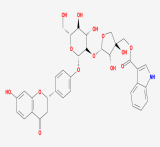 | |
| MOL008259 | | Ariskanin A | 109.51 | | | 0.40 | 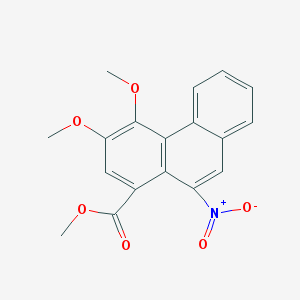 | |
| MOL004838 | | Kaempferol | 41.88 | | | 0.24 | 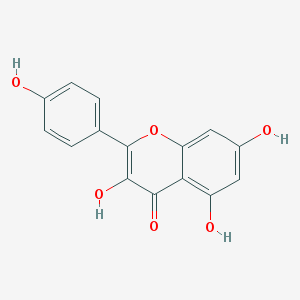 | |
| MOL004848 | | Vestitol | 74.66 | | | 0.21 | 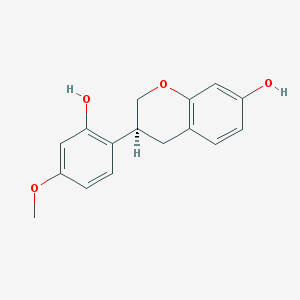 | |
| MOL005003 | | [Glabrone](https://tcmspw.com/molecule.php?qn=4598" \o "https://tcmspw.com/molecule.php?qn=4598) | 52.51 | | | 0.50 | 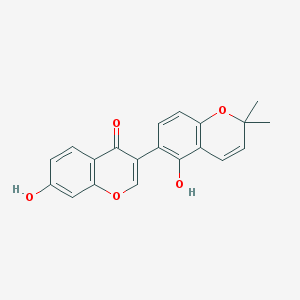 | |
| MOL007835 | | Aristoloside_qt | 40.32 | | | 0.60 | 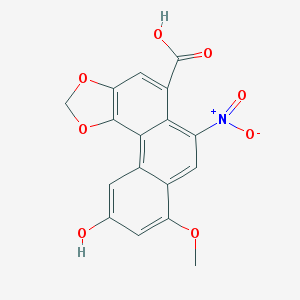 | |
| MOL000211 | | EIC | 41.90 | | | 0.14 | 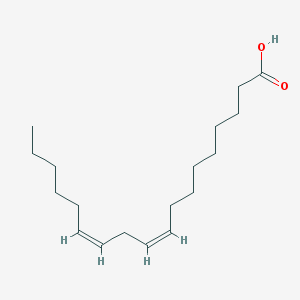 | |
| MOL000500 | | Isorhamnetin | 49.60 | | | 0.31 | 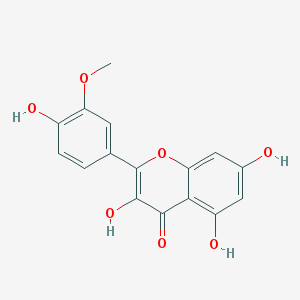 | |
| MOL004815 | | Quercetin | 46.43 | | | 0.28 | 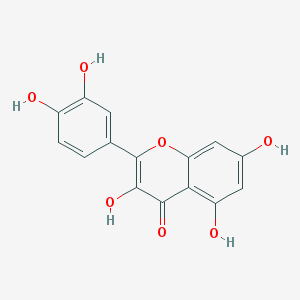 | |
| MOL004648 | | β-Sitosterol | 15.00 | | | 0.81 | 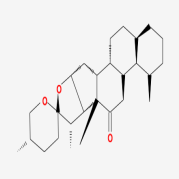 | |
| MOL002913 | | Dihydrobaicalin_qt | 40.04 | | | 0.21 | 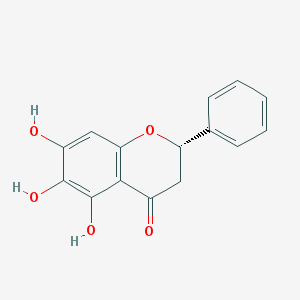 | |
| MOL004833 | | Sitosterol | 36.91 | | | 0.75 | 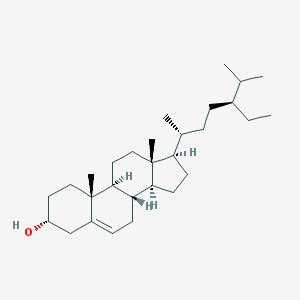 | |

***OB: oral bioavailability, DL: Drug-like**

**4. Supplemental Experimental Procedures:**

**4.1 Reagents**

Quercetin and sitosterol (≥ 98% purity by HPLC) were obtained from Jingzhu Biotechnology Co. Ltd.(Nanjing, China), and LPS (purity ≥ 98%) was purchased from TCI Shanghai (Shanghai, China). LPS was purchased from Sigma-Aldrich Co.(St. Louis, United States). The commercial kits for measuring the tumor necrosis factor alpha (TNF-α) and interferon-gamma (IFN-γ) were purchased from Nanjing Jiancheng Biotechnology Co. Ltd.(Nanjing, China). DMEM medium, fetal bovine serum (FBS), 0.25% trypsin, and 3-(4, 5-dimethylthiazol-2-yl)-2, 5-diphenyltetrazolium bromide (MTT) were purchased from Shanghai Sangon Biotechnology Co. Ltd. (Shanghai, China).

**4.2 Cell Culture and Treatment**

RAW264.7 cells were obtained from the cell bank of the Chinese Academy of Sciences (Shanghai, China). The cells were cultured in DMEM with 10% FBS, and incubated at 37°C under 5% CO2 . When RAW264.7 cells reached 80% confluency, the cells were treated with quercetin and sitosterol for 2 h, then the cells were treated with LPS (1 μg/mL) for 24 h.

**4.3 Cell Viability Assay**

MTT assay was utilized to measure cell viability. RAW264.7 cells (6×104 per/well) were seeded in 96-well plates. After 24 h incubation, RAW264.7 cells were treated with 10, 20, 30, 40 and 50 μM quercetin and sitosterol for 24 h. 10 μL of MTT were added to reach a final concentration of 0.5 mg/mL, and incubated for a further 4 h. The absorbance was measured at 570 nm with a microplate reader (BioTek, USA).
